# Supplementary material for: De novo transcriptome sequencing of Impatiens uliginosa and the analysis of candidate genes related to spur development
Source: PubMed Central journal article supplement (PMC9713998; doi:10.1186/s12870-022-03894-1), 2022-12-01
Supplement: 12870_2022_3894_MOESM2_ESM.pdf [file 12870_2022_3894_MOESM2_ESM.pdf]

**A** GO enrichment analysis(DEB\_vs\_DEC)

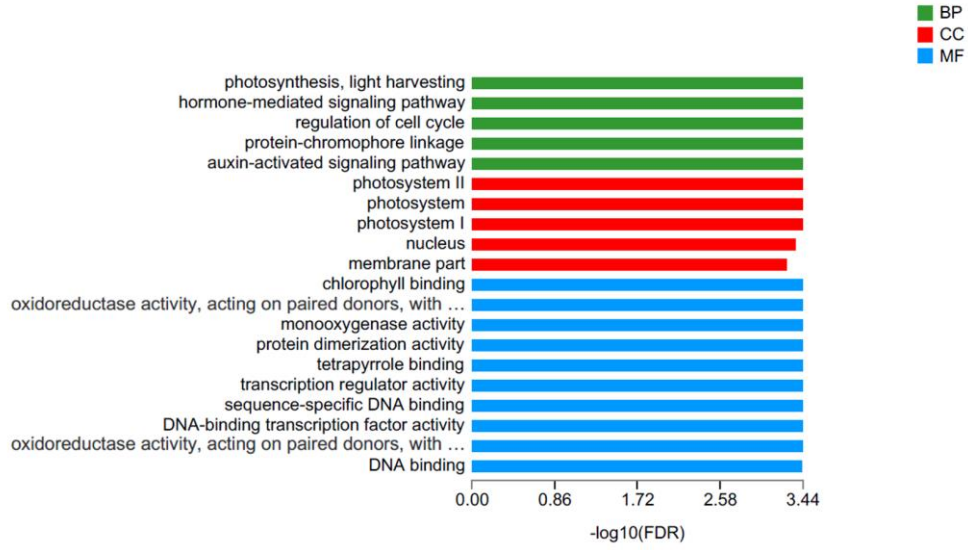

**B** GO enrichment analysis(DMB\_vs\_DMC)

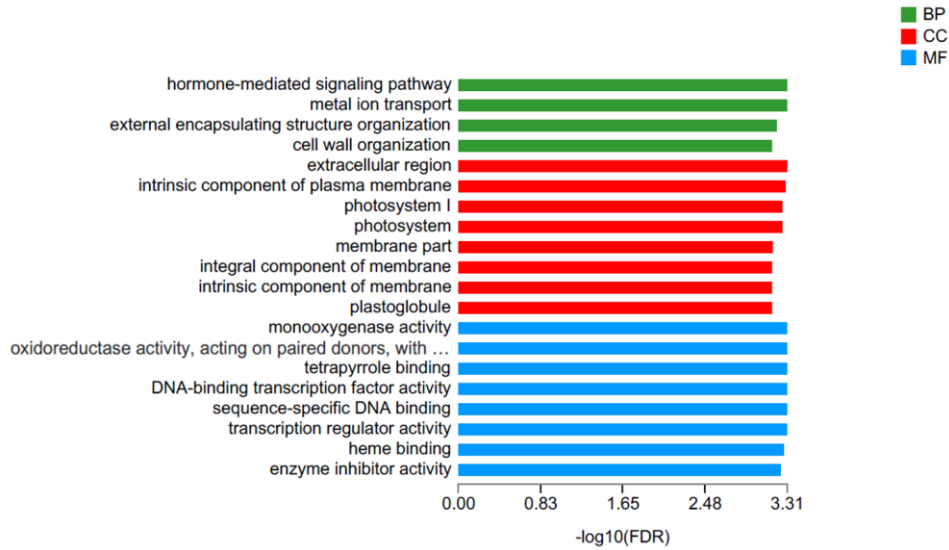

**C** GO enrichment analysis(DAB\_vs\_DAC)

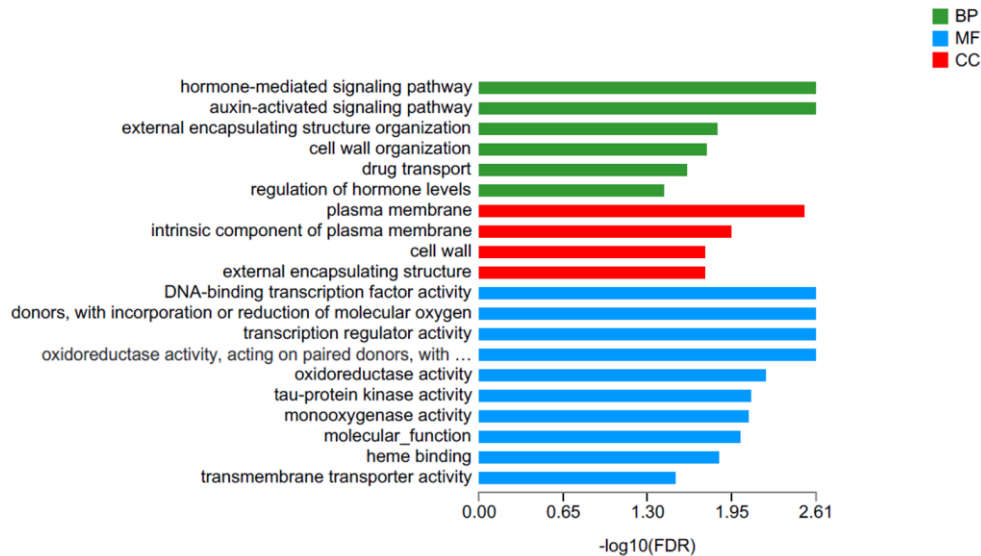

**D**

## GO enrichment analysis(DEC\_vs\_DMC)

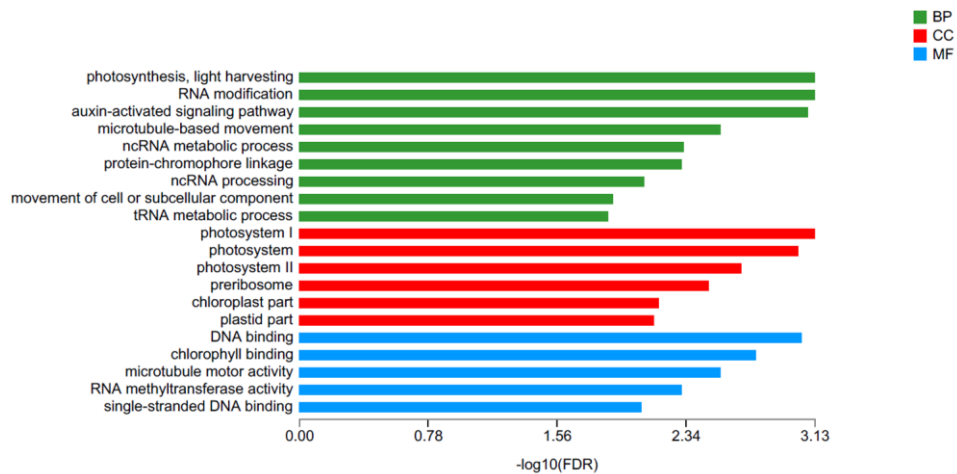**E**

## GO enrichment analysis(DMC\_vs\_DAC)

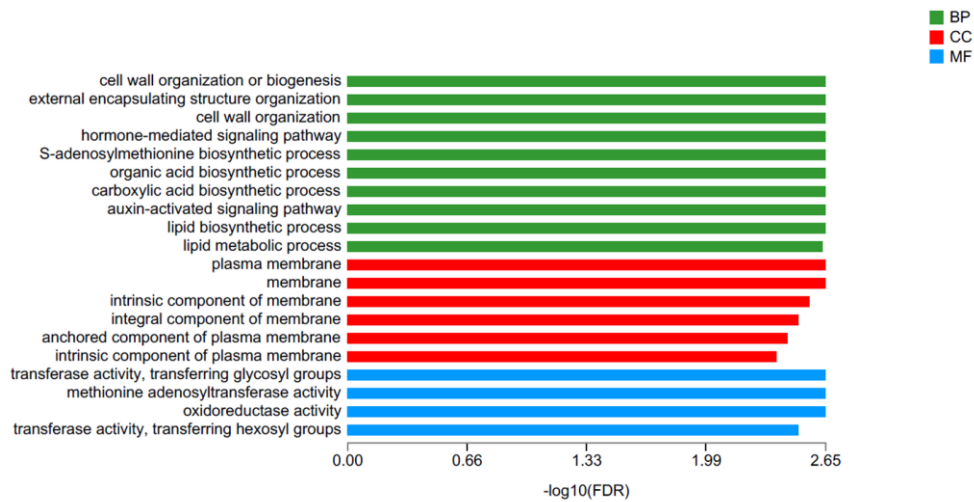

Figure S2 The top 20 enriched GO terms of DEGs in different groups, the ordinate represents GO terms,  $-\log_{10}(\text{FDR})$  represents the significance level of enrichment. (A) GO enrichment analysis of DEGs between DEB and DEC (B) GO enrichment analysis of DEGs between DMB and DMC (C) GO enrichment analysis of DEGs between DAB and DAC (D) GO enrichment analysis of DEGs between DEC and DMC (E) GO enrichment analysis of DEGs between DMC and DAC.
