# Supplementary material for: De novo transcriptome sequencing of Impatiens uliginosa and the analysis of candidate genes related to spur development
Source: PubMed Central journal article supplement (PMC9713998; doi:10.1186/s12870-022-03894-1), 2022-12-01
Supplement: 12870_2022_3894_MOESM3_ESM.pdf [file 12870_2022_3894_MOESM3_ESM.pdf]

**A** KEGG enrichment analysis(DEB\_vs\_DEC)

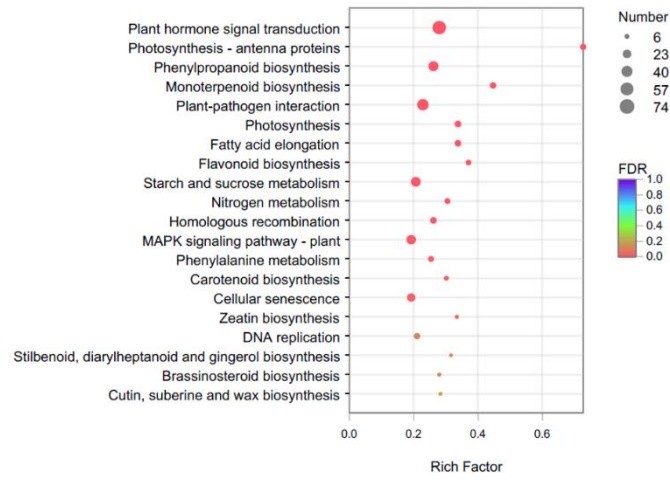

**B** KEGG enrichment analysis(DMB\_vs\_DMC)

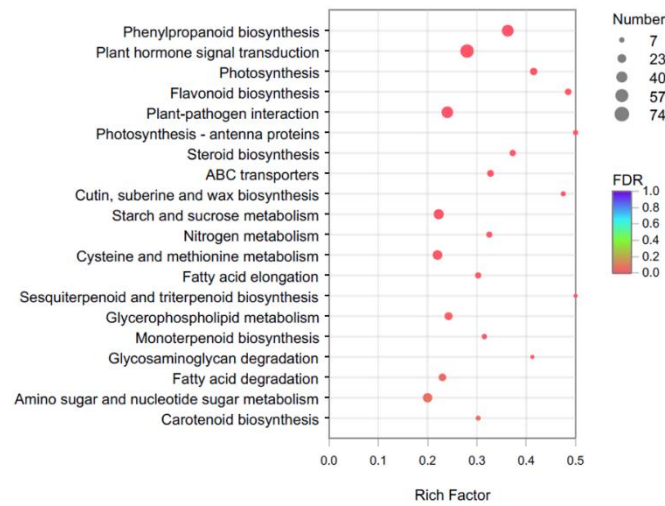

**C** KEGG enrichment analysis(DAB\_vs\_DAC)

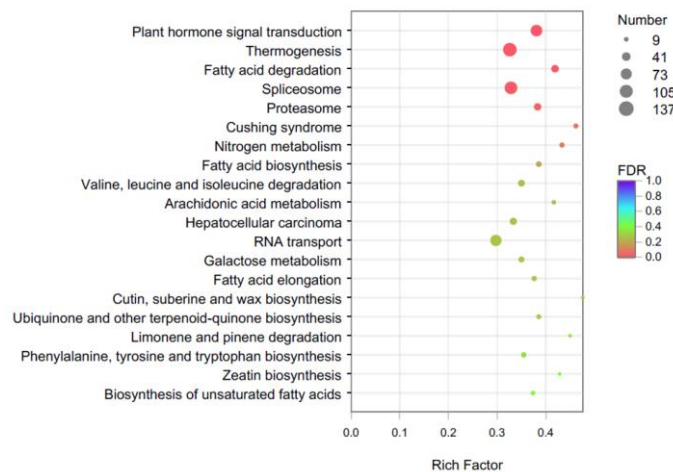

### D KEGG enrichment analysis(DEC\_vs\_DMC)

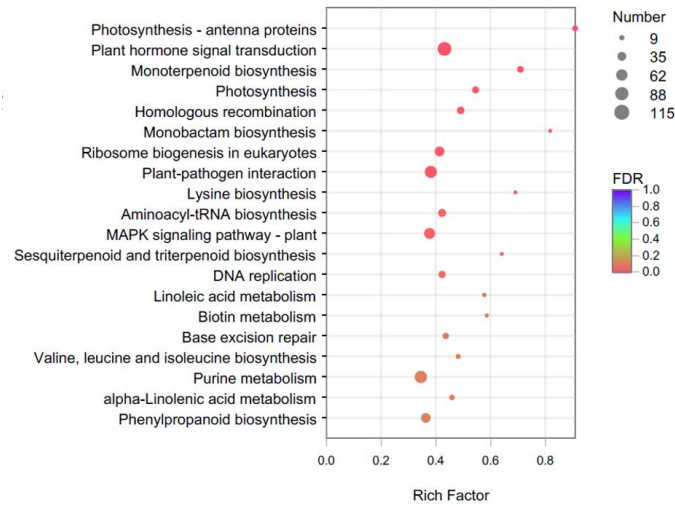

### E KEGG enrichment analysis(DMC\_vs\_DAC)

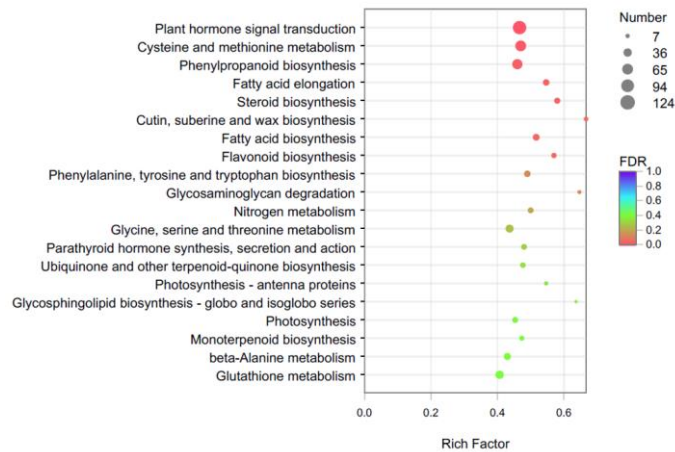

Figure S3 The top 20 enriched KEGG pathways of DEGs in different groups, the ordinate represents KEGG pathways, the rich factor represents the significant level of enrichment, the size of the point represents the number of unigenes, the color of the point corresponds to the range of q-value. (A) KEGG enrichment analysis of DEGs between DEB and DEC (B) KEGG enrichment analysis of DEGs between DMB and DMC (C) KEGG enrichment analysis of DEGs between DAB and DAC (D) KEGG enrichment analysis of DEGs between DEC and DMC (E) KEGG enrichment analysis of DEGs between DMC and DAC.
