# Supplementary material for: De novo transcriptome sequencing of Impatiens uliginosa and the analysis of candidate genes related to spur development
Source: PubMed Central journal article supplement (PMC9713998; doi:10.1186/s12870-022-03894-1), 2022-12-01
Supplement: 12870_2022_3894_MOESM4_ESM.pdf [file 12870_2022_3894_MOESM4_ESM.pdf]

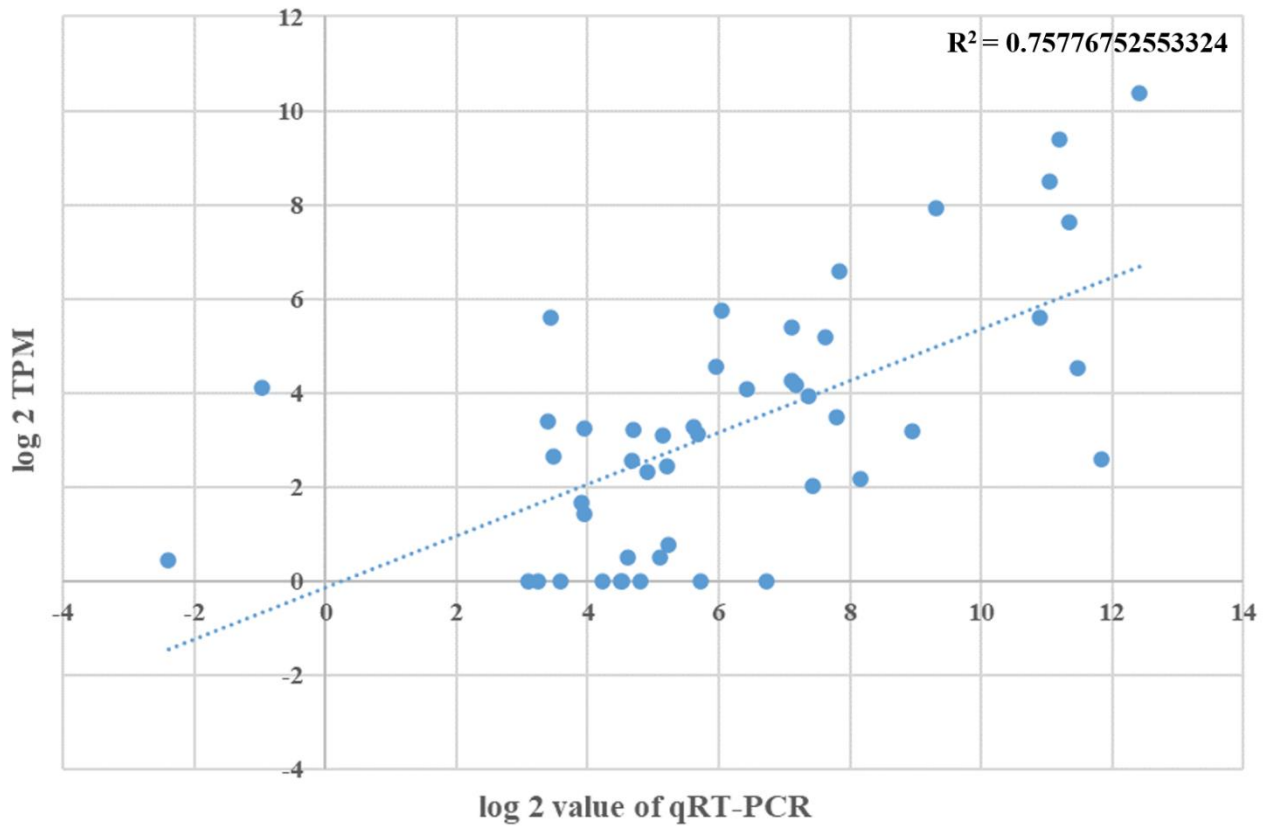

Figure S4 Correlation between RNA-seq expression levels (TPM) and qRT-PCR expression levels.
