# Supplementary material for: De novo transcriptome sequencing of Impatiens uliginosa and the analysis of candidate genes related to spur development
Source: PubMed Central journal article supplement (PMC9713998; doi:10.1186/s12870-022-03894-1), 2022-12-01
Supplement: 12870_2022_3894_MOESM5_ESM.pdf [file 12870_2022_3894_MOESM5_ESM.pdf]

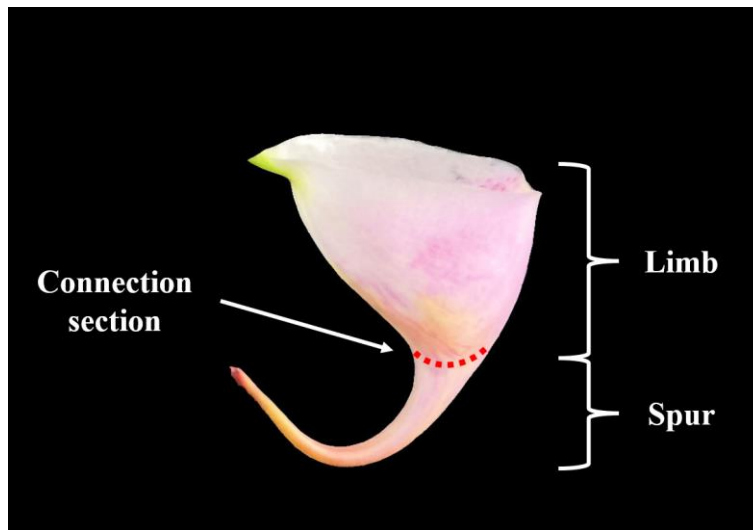

Figure S5 The labellum of *I. uliginosa*. The funnel-shaped part is the limb, and the curved tubular part is the spur, dashed red line indicates the connection section.
